# Supplementary material
Source: Springer Nature journal article supplement (https://www.springermedizin.de/resource/supplementary/13012_2008_138_MOESM9_ESM.pdf/9629442)

### module A, July-Dec 2007

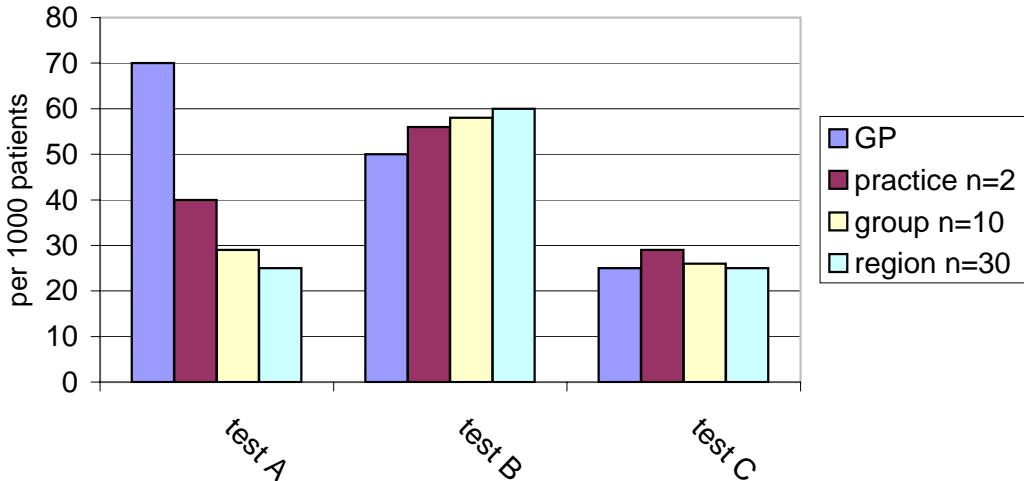

Supplement: MOESM9 [file 9629442]
